# Supplementary material for: A Ctnnb1 enhancer regulates neocortical neurogenesis by controlling the abundance of intermediate progenitors
Source: PubMed Central journal article supplement (PMC9343459; doi:10.1038/s41421-022-00421-2), 2022-08-02
Supplement: 41421_2022_421_MOESM1_ESM.pdf [file 41421_2022_421_MOESM1_ESM.pdf]

## Supplementary information

1  
2  
3  
4  
5  
6  
7  
8  
9

**A *Cttnb1* enhancer regulates neocortical neurogenesis by controlling the abundance of intermediate progenitors**

Junbao Wang<sup>1,#</sup>, Andi Wang<sup>1,#</sup>, Kuan Tian<sup>1</sup>, Xiaojiao Hua<sup>1</sup>, Bo Zhang<sup>1</sup>, Yue Zheng<sup>1</sup>,  
Xiangfei Kong<sup>1</sup>, Wei Li<sup>1</sup>, Lichao Xu<sup>1</sup>, Juan Wang<sup>2</sup>, Zhiqiang Li<sup>1</sup>, Ying Liu<sup>1,\*</sup>, Yan Zhou<sup>1,\*</sup>

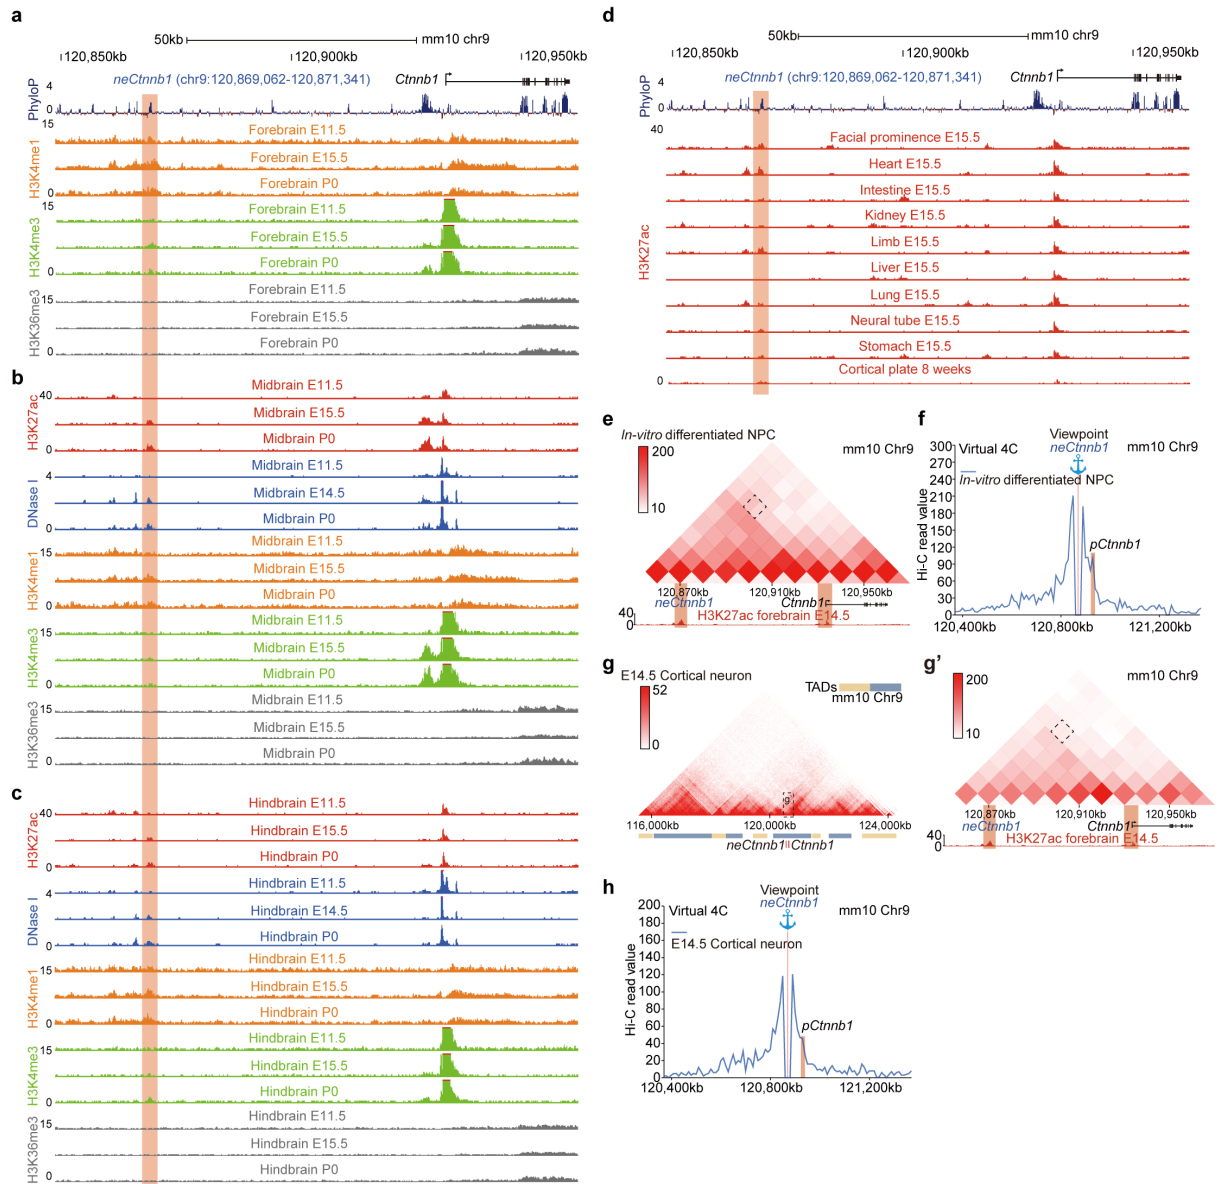

10

11 **Supplementary Figure S1. *neCtnnb1* is a putative enhancer upstream of *Ctnnb1*.**

12 **a-c** Schematic representation of the upstream region of mouse *Ctnnb1* gene and the  
 13 location of putative enhancer *neCtnnb1* (orange shading). Enrichment of indicated  
 14 signals in developing forebrains (**a**), midbrains (**b**) and hindbrains (**c**) were shown.  
 15 Data were obtained from ENCODE. **d** Enrichment of H3K27ac ChIP-seq signals in  
 16 indicated tissues of E15.5 embryos. Data were obtained from ENCODE. **e-f** The Hi-C  
 17 data (**e**) and virtual 4C (**f**) of *in-vitro* differentiated NPCs revealing the interaction  
 18 between *neCtnnb1* and *pCtnnb1*. **g** The Hi-C data of E14.5 cortical neurons were  
 19 obtained from the 3D genome browser. Boundaries of TADs and locations of *neCtnnb1*  
 20 and *Ctnnb1* gene (red bars) are indicated below. **g'** Regions magnified from (**g**). Boxed  
 21 area indicating the interaction between *neCtnnb1* and *pCtnnb1*. **h** Virtual 4C of E14.5  
 22 cortical neurons revealing the interaction between *neCtnnb1* and *pCtnnb1*.

23

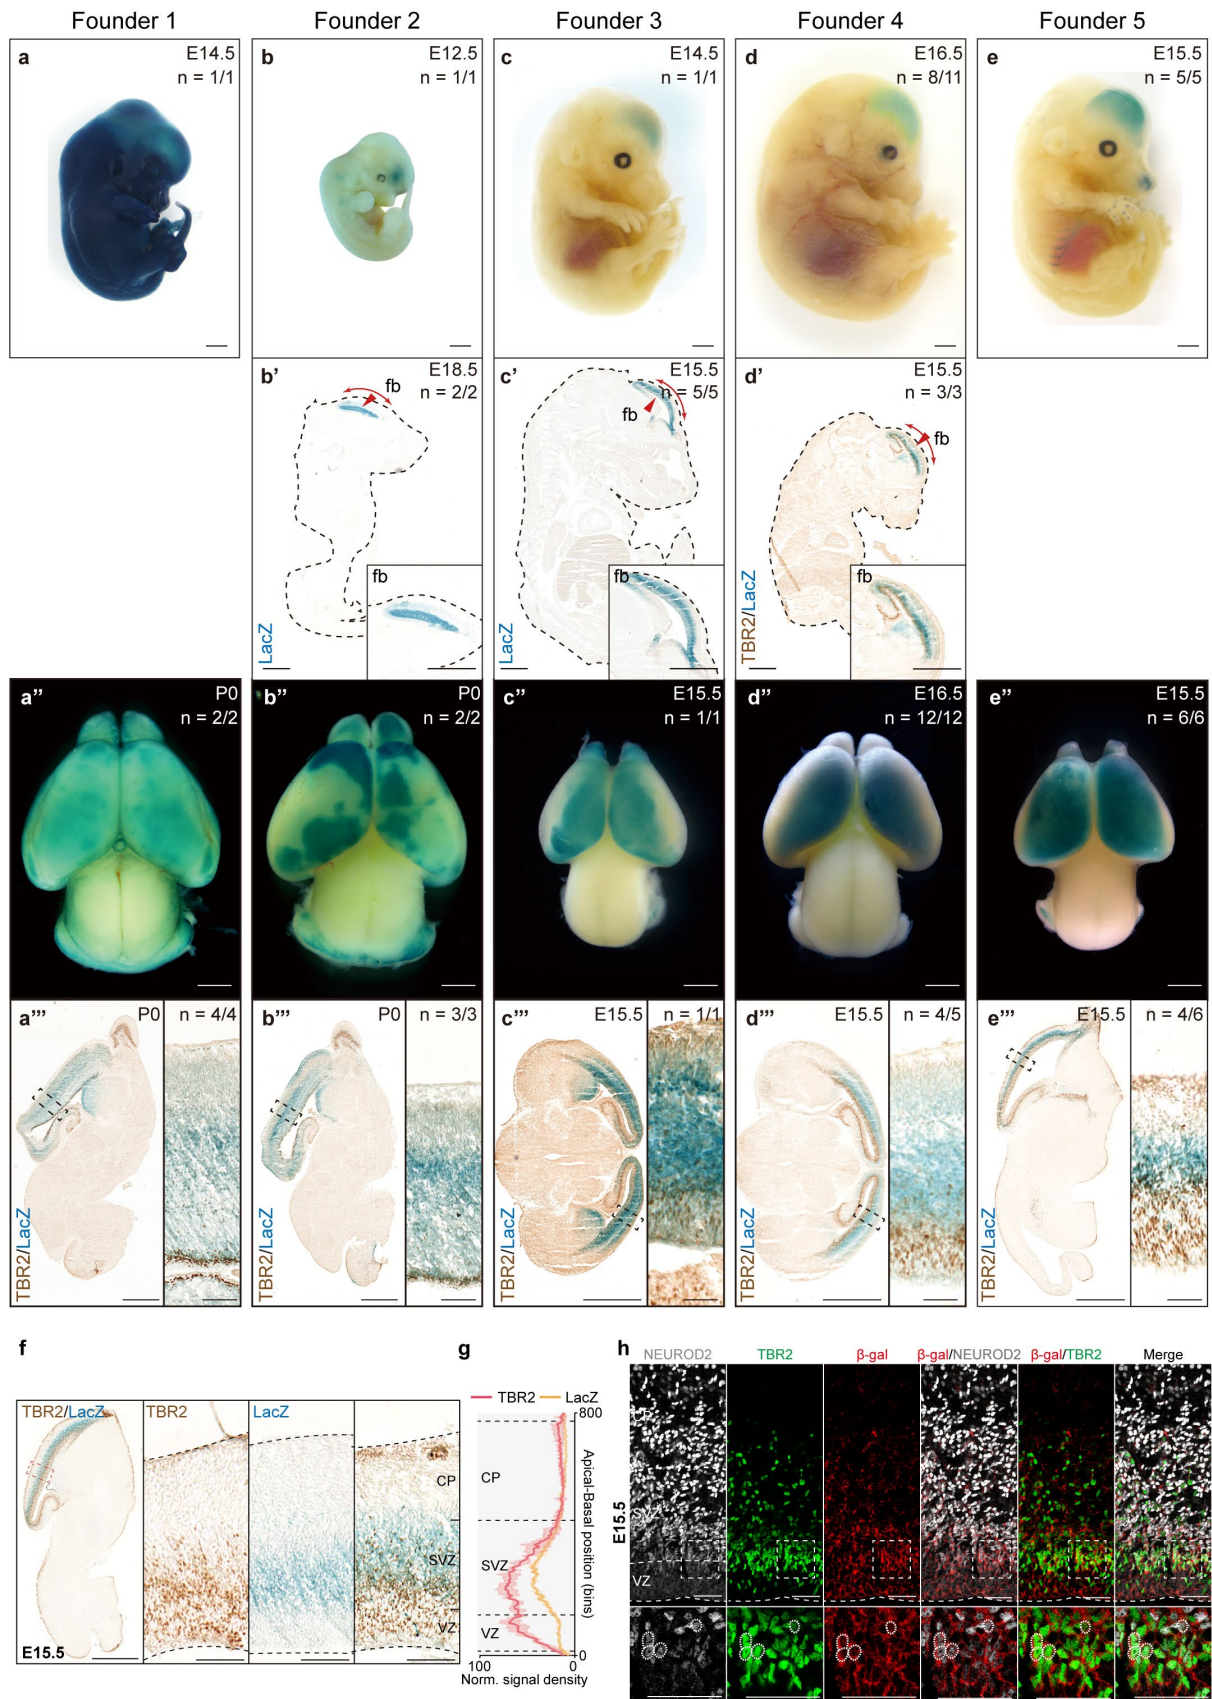

24  
25  
26

**Supplementary Figure S2. *neCtnnb1* is predominantly active in developing neocortex.**

27 **a-e** X-Gal staining (blue) of whole embryos (**a-e**), sagittal whole-body sections (**b'-d'**),  
28 brains (**a''-e''**) and sagittal/coronal brain sections (**a'''-e'''**) of *neCtnnb1-LacZ-iCre*  
29 reporter mice. Due to the influence of integration sites and copy numbers on  
30 expression, the reporter activity in a specific tissue was only considered reliable when  
31 it was found in at least two or more independent individual embryos. **f** E15.5 sagittal  
32 brains sections of *neCtnnb1-LacZ-iCre* mice were sequentially stained with LacZ/ $\beta$ -  
33 Gal (blue) for *neCtnnb1* activity and TBR2 (brown), with boxed Ncx regions magnified  
34 on right panels. **g** Quantifications of normalized signal density of  $\beta$ -Gal and TBR2  
35 signals in (**f**). **h** Immunofluorescence of NEUROD2 (gray), TBR2 (green), and  $\beta$ -Gal  
36 (red) on coronal sections of E15.5 *neCtnnb1-LacZ-iCre* Ncx. Scale bars, 1mm (**a-e**,  
37 **b'-d'**, **a''-e''**, **a'''-e'''** and **f**), 100  $\mu$ m (magnified views in **a'''-e'''** and **f**), 50  $\mu$ m (**h**).  
38



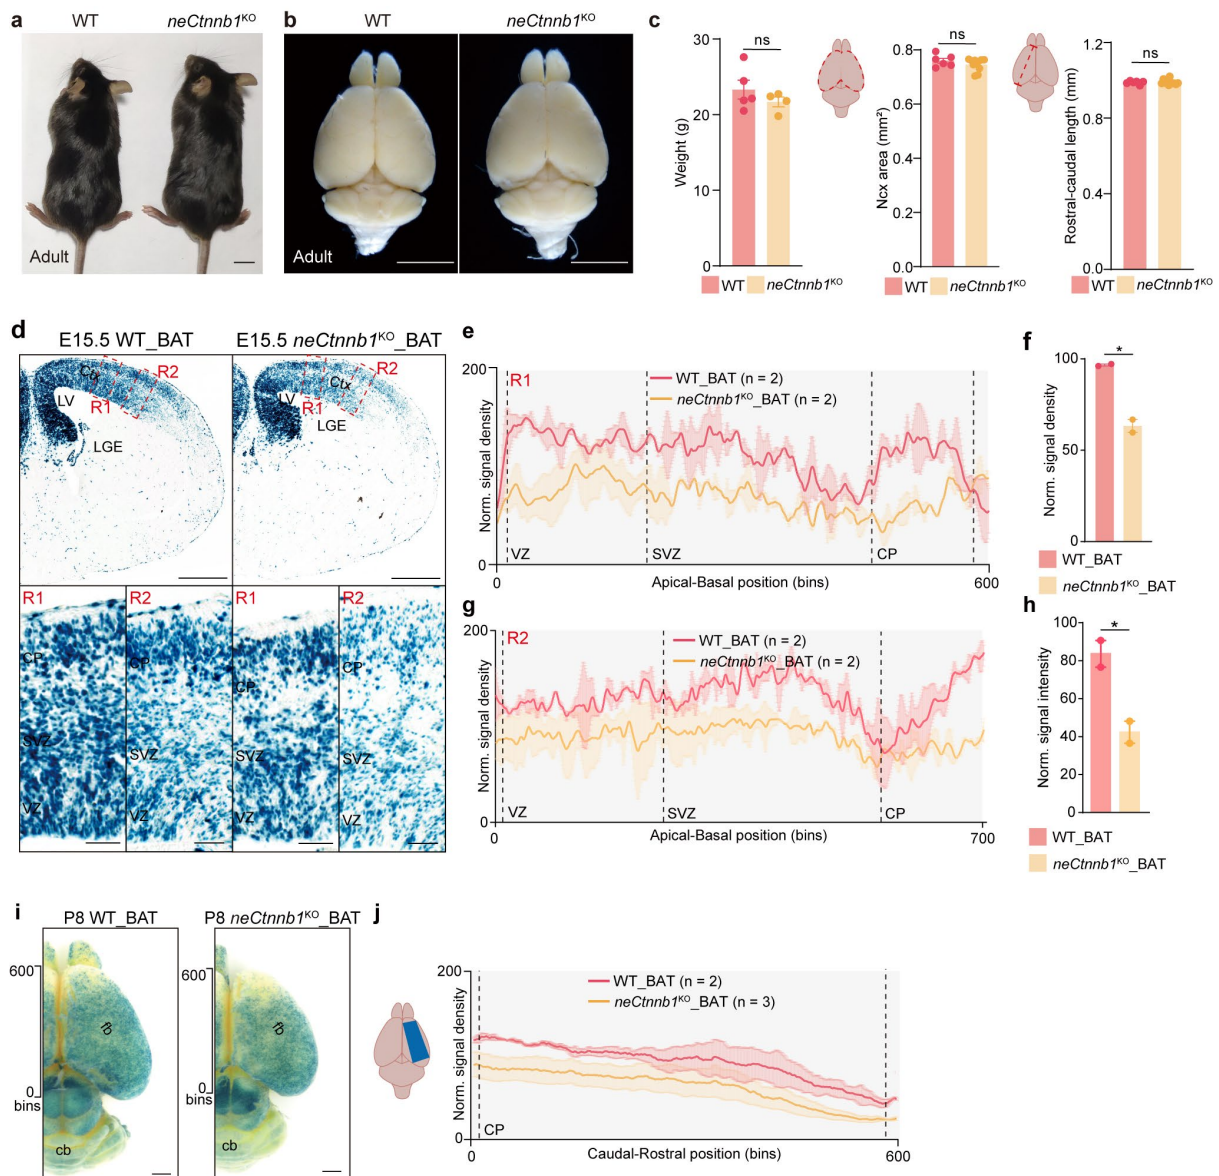

39

40 **Supplementary Figure S3. Knockout of *neCtnnb1* compromised *Ctnnb1*'s**  
 41 **reporter activity in developing neocortices.**

42 **a** Representative images of adult (8 weeks) WT and *neCtnnb1*<sup>KO</sup> mice. **b** Dorsal views  
 43 of adult WT and *neCtnnb1*<sup>KO</sup> mouse brains. **c** Quantifications of adult WT and  
 44 *neCtnnb1*<sup>KO</sup> mice in body weight, neocortex area and length. n = 5 for WT brains and  
 45 n = 4 for *neCtnnb1*<sup>KO</sup> brains. Each point represents an individual brain. **d** X-Gal  
 46 staining (blue) on E15.5 coronal sections of WT\_BAT (left) and *neCtnnb1*<sup>KO</sup>\_BAT (right)  
 47 Ncx, with boxed regions (R1s and R2s) magnified on the bottom. **e-h** Quantification of  
 48 normalized signal density of LacZ in two boxed regions of (**d**). n = 2 for WT\_BAT brains  
 49 and n = 2 for *neCtnnb1*<sup>KO</sup>\_BAT brains. Each point represents an individual brain. **i** X-  
 50 Gal staining (blue) in P8 WT\_BAT (left) and *neCtnnb1*<sup>KO</sup>\_BAT (right) whole mount  
 51 brains. **j** Quantification of normalized signal density of LacZ in boxed regions of (**i**). n

52 = 2 for WT\_BAT brains and n = 3 for *neCtnnb1*<sup>KO</sup>\_BAT brains. Each point represents  
53 an individual brain. Quantification data are shown as mean ± SEM. Statistical  
54 significance was determined using an unpaired two-tailed Student's *t*-test (**c**, **f** and **h**)  
55 \**P* < 0.05, \*\**P* < 0.01, and \*\*\**P* < 0.001. ns, not significant. Scale bars, 1 cm (**a** and **i**),  
56 500 μm (**b** and **d**), 50 μm (magnified views in **d**).  
57

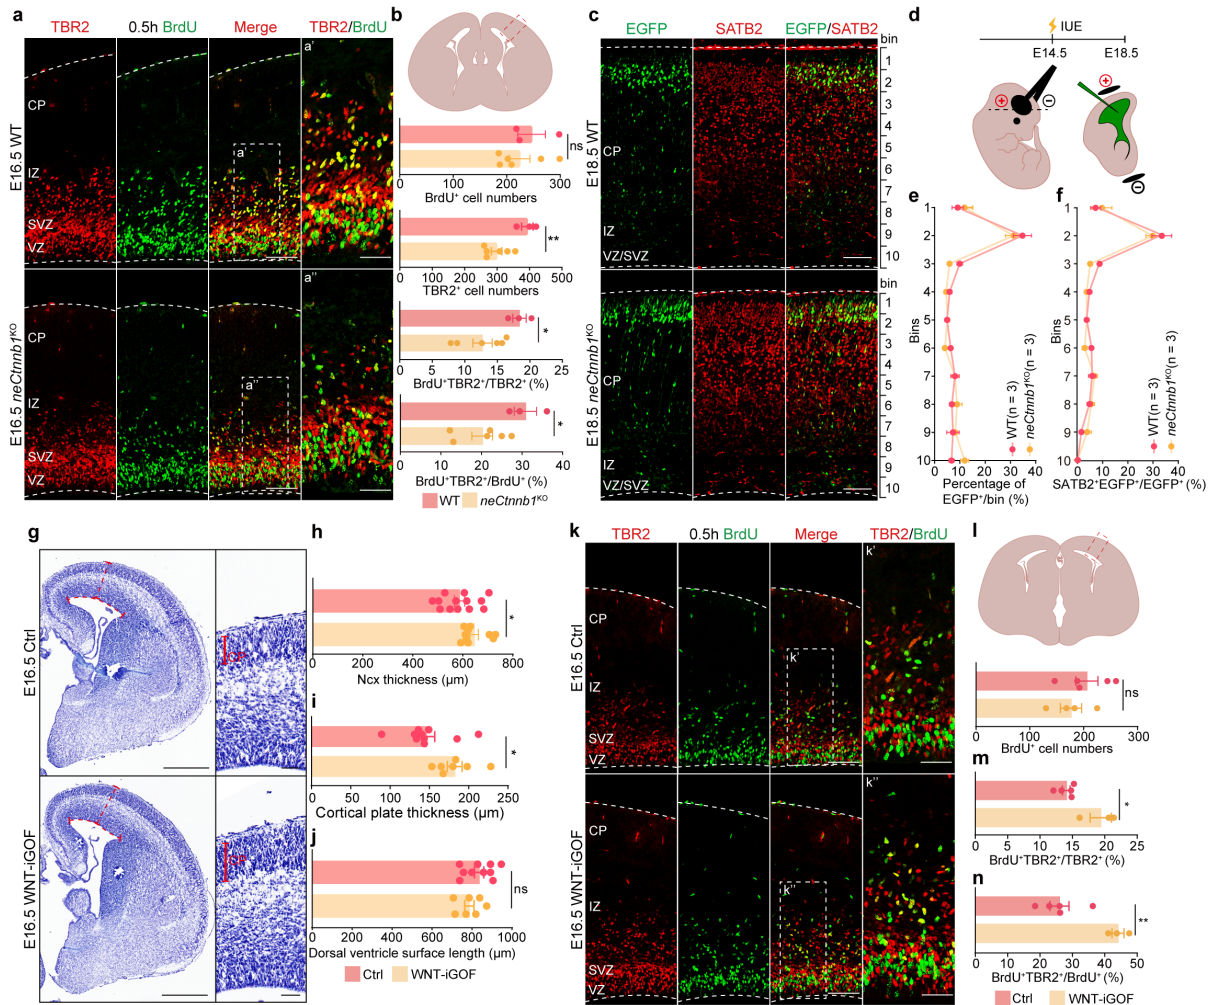

58

59 **Supplementary Figure S4. *neCtnnb1* regulates neocortical neurogenesis and IP**  
 60 **divisions.**

61 **a-b** Immunofluorescence (**a**) and quantification (**b**, top) of BrdU<sup>+</sup> (green) and TBR2<sup>+</sup>  
 62 (red) cells on boxed area of coronal sections (**b**) of E16.5 WT and *neCtnnb1*<sup>KO</sup> Ncx.  
 63 Pregnant mice were injected with BrdU 30 min before sacrifice. n = 3 for WT brains  
 64 and n = 6 for *neCtnnb1*<sup>KO</sup> brains. Each point represents an individual brain. **c**  
 65 Immunofluorescence of SATB2<sup>+</sup> (red) and EGFP<sup>+</sup> (green) cells on E18.5 coronal  
 66 sections of WT and *neCtnnb1*<sup>KO</sup> Ncx. Neocortex were electroporated with EGFP-  
 67 expressing constructs at E14.5. **d** Schematic diagram illustrating the strategy of *in*  
 68 *utero* electroporation (IUE) of WT and *neCtnnb1*<sup>KO</sup> embryos. **e-f** Neocortices shown in  
 69 (**c**) were divided into 10 bins of equal height and fixed width, and EGFP<sup>+</sup> (green) cells  
 70 in each bin were counted and quantified. n = 3 for WT brains and n = 3 for *neCtnnb1*<sup>KO</sup>  
 71 brains. Each point represents an individual brain. **g** Nissl-staining on E16.5 coronal  
 72 sections of Ctrl and WNT-iGOF Ncx. **h** Comparison of neocortical thickness of E16.5  
 73 Ctrl and WNT-iGOF mice. n = 13 for Ctrl brains and n = 10 for WNT-iGOF brains. Each  
 74 point represents an individual brain. **i** Comparison of cortical plate thickness of E16.5

75 Ctrl and WNT-iGOF mice. n = 10 for Ctrl brains and n = 7 for WNT-iGOF brains. Each  
76 point represents an individual brain. **j** Comparison of dorsal ventricle surface length of  
77 E16.5 Ctrl and WNT-iGOF mice. n = 10 for Ctrl brains and n = 7 for WNT-iGOF brains.  
78 Each point represents an individual brain. **k-n** Immunofluorescence (**k**) and  
79 quantification (**l-n**) of TBR2+ (red) and BrdU+ (green) cells on boxed area of coronal  
80 sections (**l**) of E16.5 Ctrl and WNT-iGOF Ncx. Pregnant mice were injected with BrdU  
81 30 min before sacrifice. Each point represents an individual brain. Quantification data  
82 are shown as mean  $\pm$  SEM. Statistical significance was determined using unpaired  
83 two-tailed Student's *t*-test (**b**, **h**, **i**, **j**, **l**, **m** and **n**); two-way ANOVA followed by Sidak's  
84 multiple comparisons test (**e** and **f**). \**P* < 0.05, \*\**P* < 0.01, \*\*\**P* < 0.001, and \*\*\*\**P* <  
85 0.0001. ns, not significant. Scale bars, 500  $\mu$ m (**g**), 100  $\mu$ m (**a**, **c**, **k** and magnified  
86 views in **g**), 50  $\mu$ m (magnified views in **a** and **k**).  
87

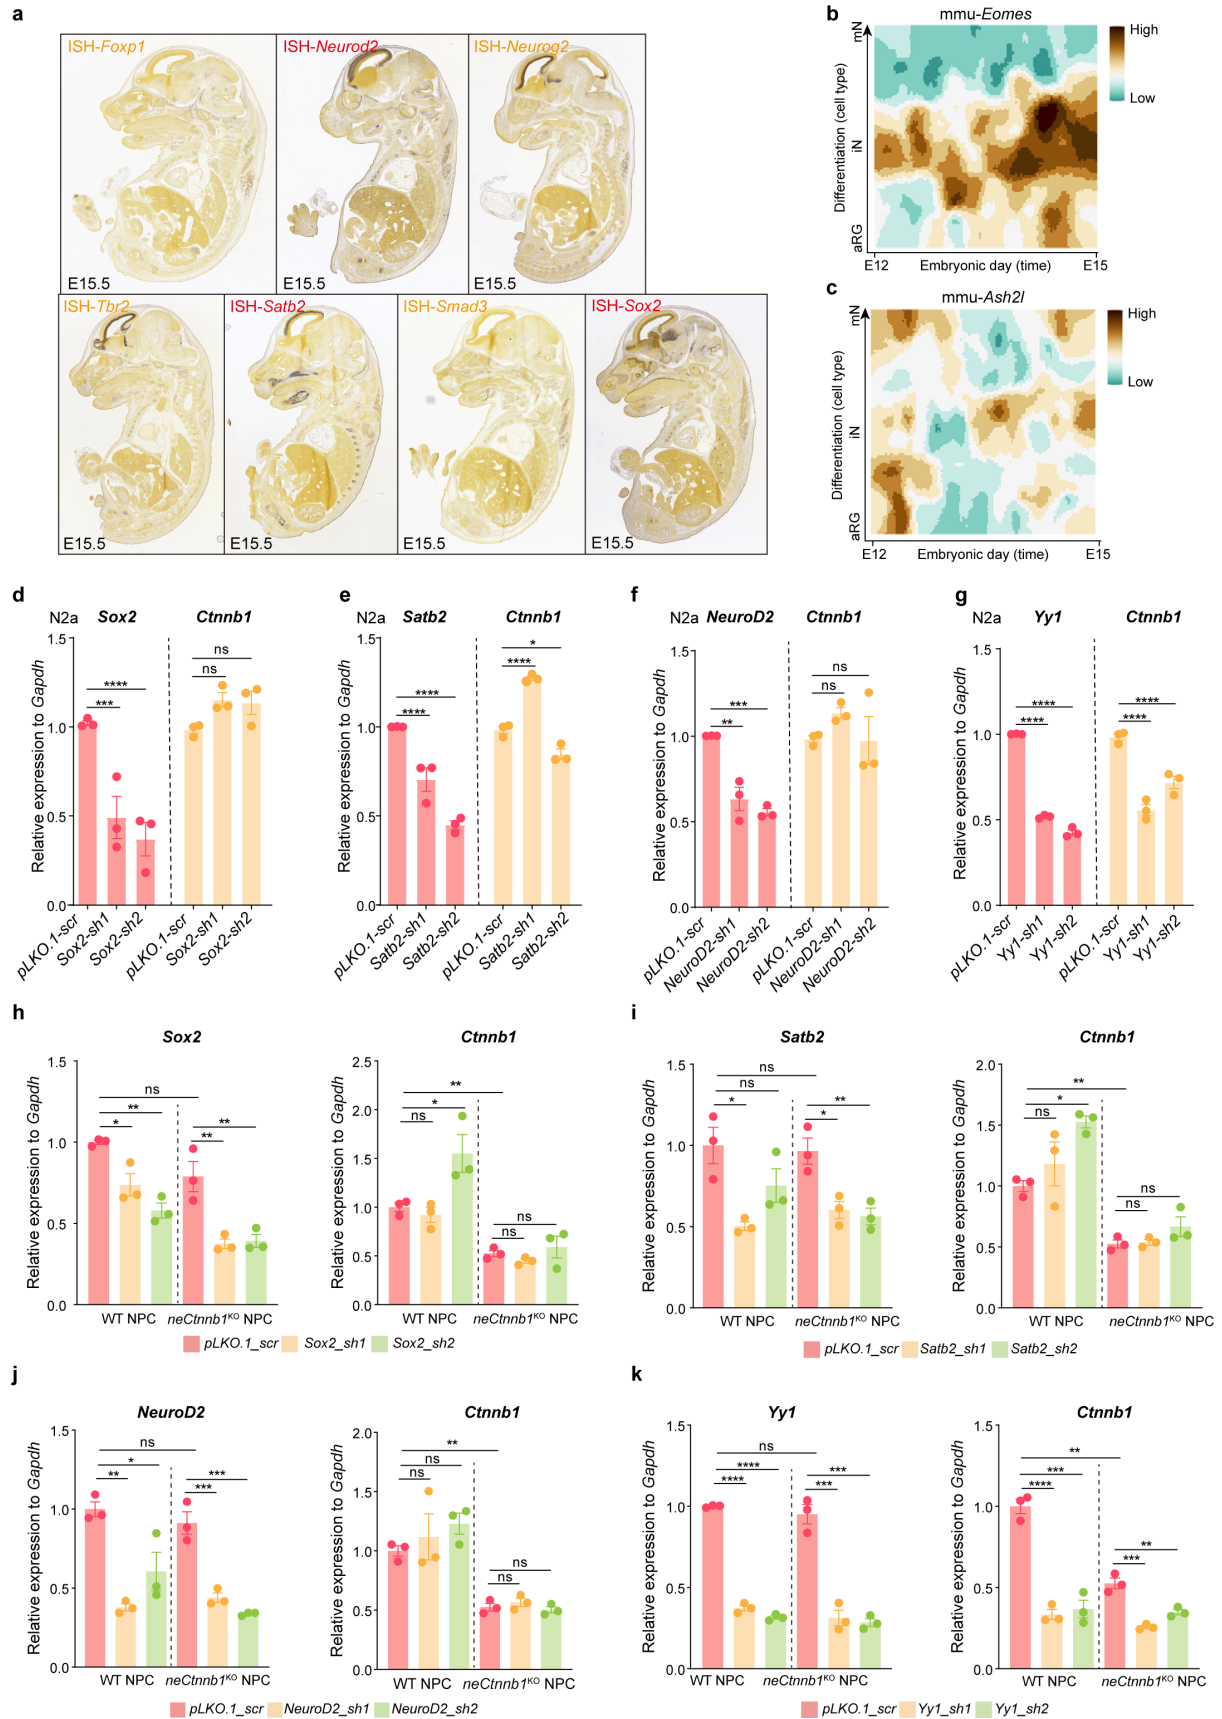

88

89 **Supplementary Figure S5. Effects of selected *trans*-acting factors on**



90 **expressions of *Ctnnb1*.**

91 **a** Representative images showing *in situ* hybridization (ISH) of *Foxp1*, *Neurod2*,  
92 *Neurog2*, *Tbr2*, *Satb2*, *Smad3* and *Sox2* on sagittal sections of E15.5 mouse embryos.  
93 Data were extracted from the Allan Brain Atlas. **b-c** Expression patterns of *Eomes* (**b**)  
94 and *Ash2l* (**c**) during mouse neocortical neurogenesis. Visualized single-cell RNA-seq  
95 data were extracted from Humous.org (<http://www.humous.org/>). **d-g** RNA levels of  
96 *Sox2* (**d**), *Satb2* (**e**), *NeuroD2* (**f**), *Yy1* (**g**) and *Ctnnb1* in Neuro-2a transfected with  
97 indicated vectors for two days. Each point represents an independent experiment. **h-**  
98 **k** RNA levels of *Sox2* (**h**), *Satb2* (**i**), *NeuroD2* (**j**), *Yy1* (**k**) and *Ctnnb1* in WT and  
99 *neCtnnb1*<sup>KO</sup> neocortical NPCs transfected with indicated vectors for two days. NPCs  
100 were derived from E12.5 Ncx. n = 3 for WT brains and n = 3 for *neCtnnb1*<sup>KO</sup> brains.  
101 Each point represents NPCs derived from an individual brain. Quantification data are  
102 shown as mean ± SEM. Statistical significance was determined using two-way ANOVA  
103 followed by Sidak's multiple comparisons test. (**d-k**). \**P* < 0.05, \*\**P* < 0.01, \*\*\**P* <  
104 0.001, and \*\*\*\**P* < 0.0001. ns, not significant.

105

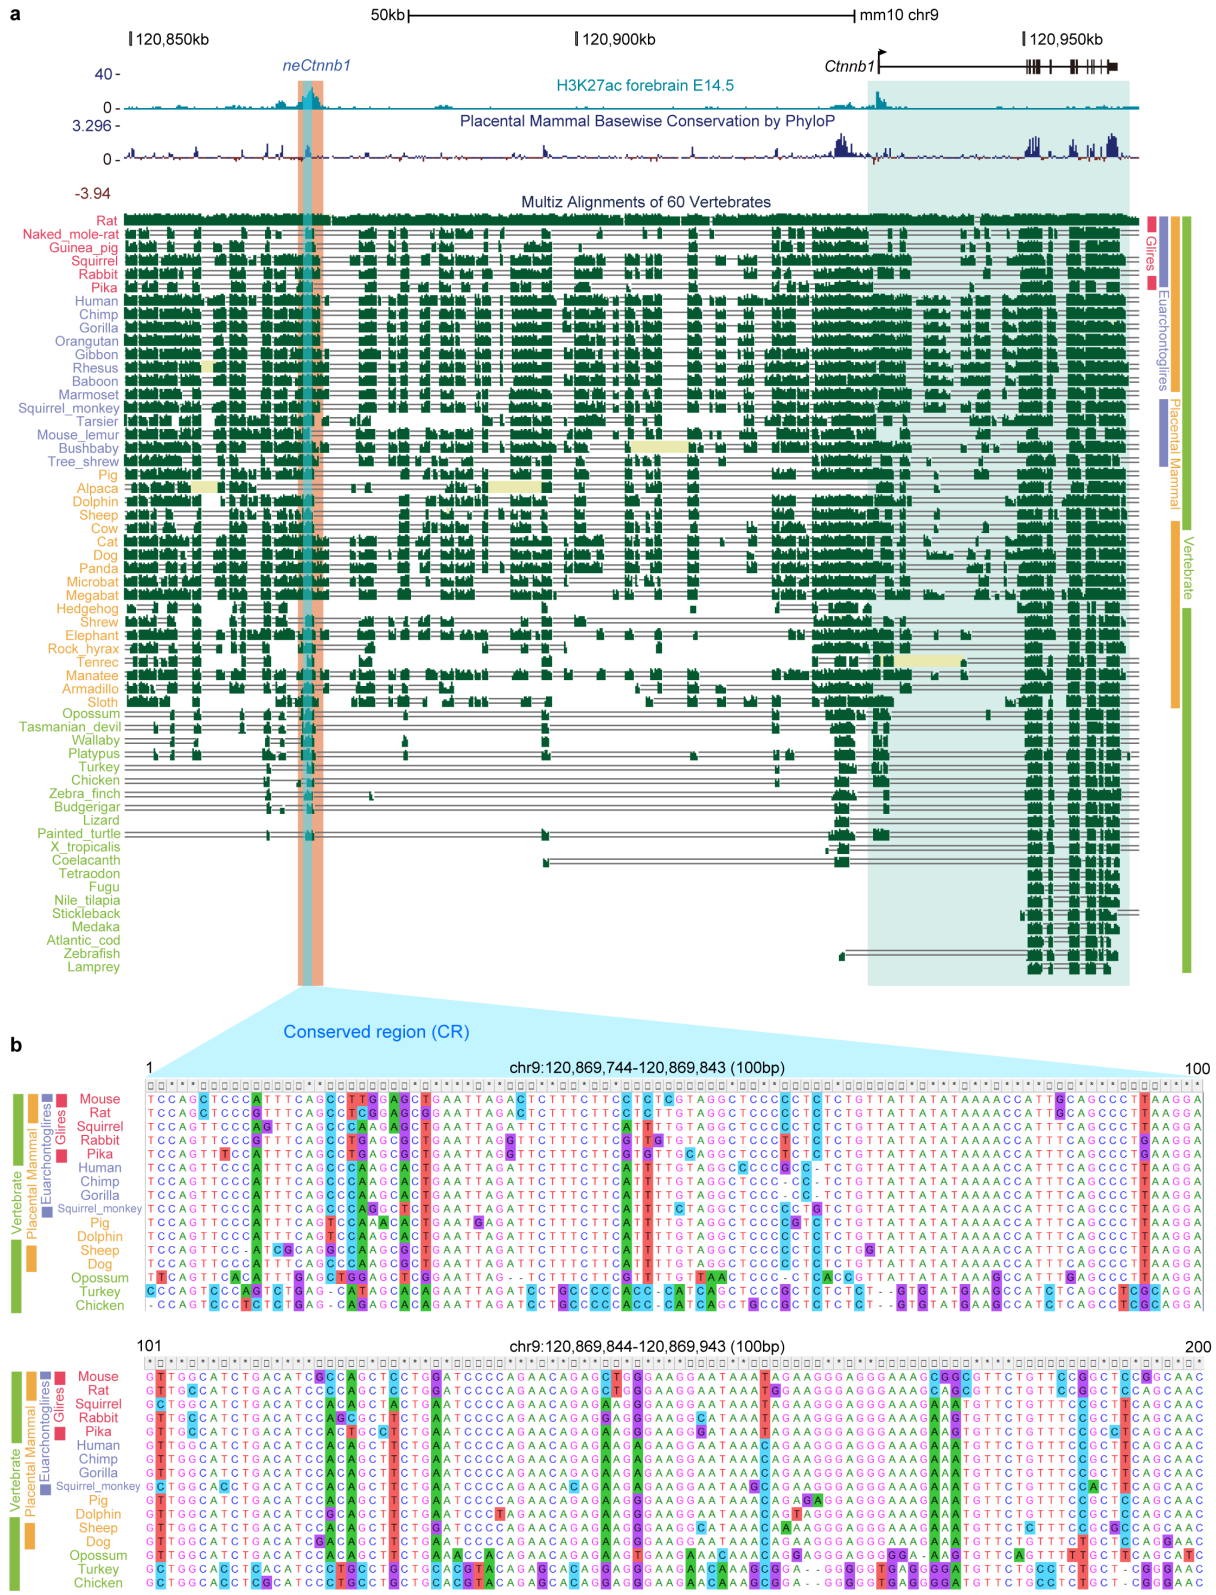

**Supplementary Figure S6. Sequence conservation of *neCtnnb1*.**

**a** UCSC genome browser track depicts conservation of *neCtnnb1* among vertebrates.

**b** Multiple sequence alignment of the core conserved region of *neCtnnb1* among

selected vertebrates. Data were extracted from the UCSC genome browser.

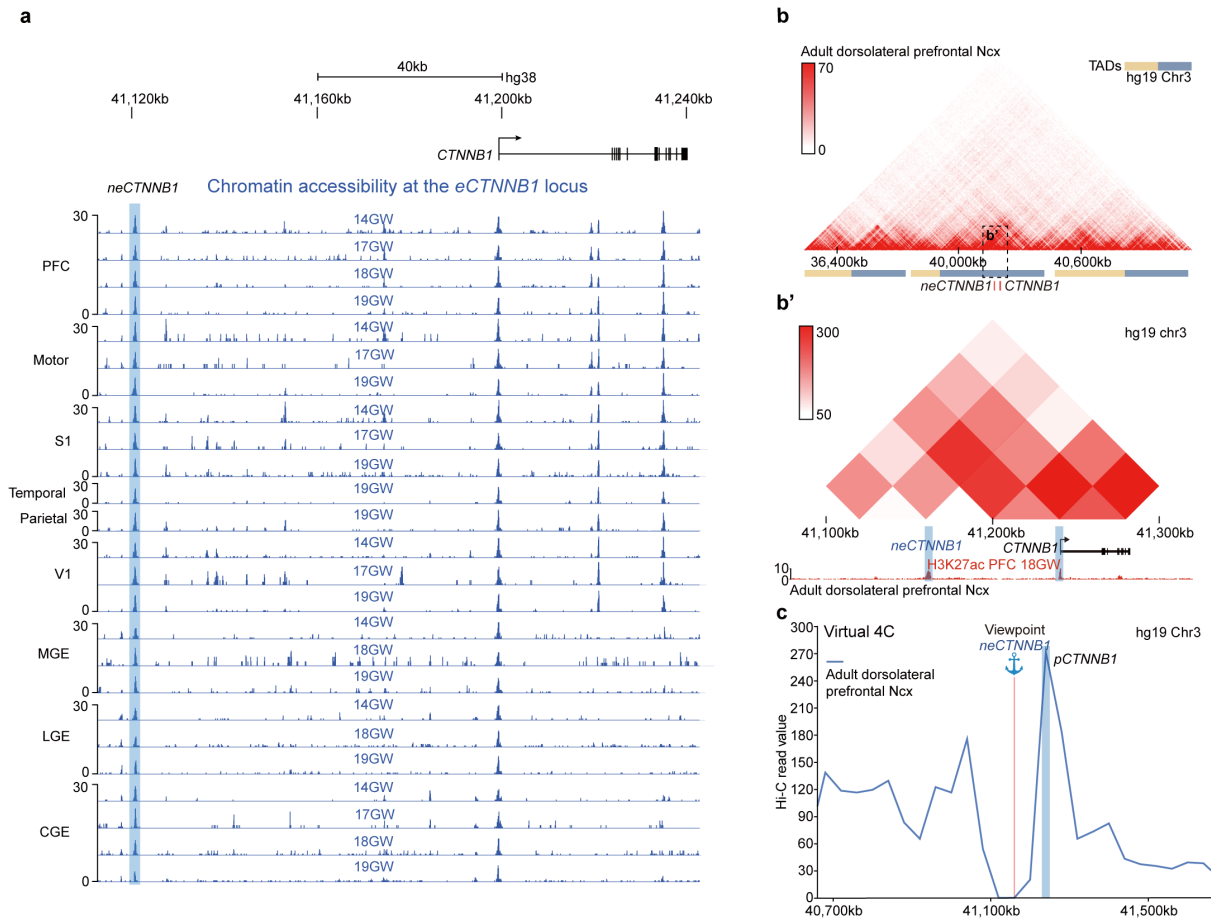

111

112 **Supplementary Figure S7. *neCTNNB1* interacts with *pCTNNB1* in developing**  
 113 **human brains.**

114 **a** Schematic representation of ATAC-seq data upstream of human *CTNNB1* gene and  
 115 the location of the putative enhancer *neCTNNB1* (blue shading). **b** The Hi-C data of  
 116 adult dorsolateral prefrontal Ncx were obtained from the 3D genome browser. The  
 117 boundaries of TADs and locations of *neCTNNB1* and *CTNNB1* are indicated below. **b'**  
 118 Regions magnified from (**b**). *neCTNNB1* interacts with *pCTNNB1* in adult dorsolateral  
 119 prefrontal Ncx. **c** Virtual 4C of adult dorsolateral prefrontal Ncx revealing interactions  
 120 between *neCTNNB1* and *pCTNNB1*. PFC, dorsal lateral prefrontal cortex; Motor,  
 121 motor cortex; S1, primary somatosensory cortex; Temporal, temporal cortex; Parietal,  
 122 parietal cortex, V1, primary visual cortex; MGE, LGE, CGE, medial, lateral, and caudal  
 123 ganglionic eminences.

124

**Table S1. Summary of data used in this study.**

| Source name                 | Organism     | Age   | Library strategy | Antibody | Serial number |
|-----------------------------|--------------|-------|------------------|----------|---------------|
| Prefrontal cortex           | Homo sapiens | 14gw  | ATAC-seq         | /        | GSE149268     |
| Prefrontal cortex           | Homo sapiens | 17gw  | ATAC-seq         | /        | GSE149268     |
| Prefrontal cortex           | Homo sapiens | 18gw  | ATAC-seq         | /        | GSE149268     |
| Prefrontal cortex           | Homo sapiens | 19gw  | ATAC-seq         | /        | GSE149268     |
| Motor cortex                | Homo sapiens | 14gw  | ATAC-seq         | /        | GSE149268     |
| Motor cortex                | Homo sapiens | 17gw  | ATAC-seq         | /        | GSE149268     |
| Motor cortex                | Homo sapiens | 19gw  | ATAC-seq         | /        | GSE149268     |
| Somatosensory cortex        | Homo sapiens | 14gw  | ATAC-seq         | /        | GSE149268     |
| Somatosensory cortex        | Homo sapiens | 17gw  | ATAC-seq         | /        | GSE149268     |
| Somatosensory cortex        | Homo sapiens | 19gw  | ATAC-seq         | /        | GSE149268     |
| Temporal cortex             | Homo sapiens | 19gw  | ATAC-seq         | /        | GSE149268     |
| Parietal cortex             | Homo sapiens | 19gw  | ATAC-seq         | /        | GSE149268     |
| Visual cortex               | Homo sapiens | 14gw  | ATAC-seq         | /        | GSE149268     |
| Visual cortex               | Homo sapiens | 17gw  | ATAC-seq         | /        | GSE149268     |
| Visual cortex               | Homo sapiens | 19gw  | ATAC-seq         | /        | GSE149268     |
| Medial ganglionic eminence  | Homo sapiens | 14gw  | ATAC-seq         | /        | GSE149268     |
| Medial ganglionic eminence  | Homo sapiens | 18gw  | ATAC-seq         | /        | GSE149268     |
| Medial ganglionic eminence  | Homo sapiens | 19gw  | ATAC-seq         | /        | GSE149268     |
| Lateral ganglionic eminence | Homo sapiens | 14gw  | ATAC-seq         | /        | GSE149268     |
| Lateral ganglionic eminence | Homo sapiens | 18gw  | ATAC-seq         | /        | GSE149268     |
| Lateral ganglionic eminence | Homo sapiens | 19gw  | ATAC-seq         | /        | GSE149268     |
| Caudal ganglionic eminence  | Homo sapiens | 14gw  | ATAC-seq         | /        | GSE149268     |
| Caudal ganglionic eminence  | Homo sapiens | 17gw  | ATAC-seq         | /        | GSE149268     |
| Caudal ganglionic eminence  | Homo sapiens | 18gw  | ATAC-seq         | /        | GSE149268     |
| Caudal ganglionic eminence  | Homo sapiens | 19gw  | ATAC-seq         | /        | GSE149268     |
| Prefrontal cortex           | Homo sapiens | 15gw  | ChIP-seq         | H3K27ac  | GSE149268     |
| Prefrontal cortex           | Homo sapiens | 17gw  | ChIP-seq         | H3K27ac  | GSE149268     |
| Prefrontal cortex           | Homo sapiens | 18gw  | ChIP-seq         | H3K27ac  | GSE149268     |
| Prefrontal cortex           | Homo sapiens | 15gw  | ChIP-seq         | H3K4me1  | GSE149268     |
| Forebrain                   | Mus musculus | E11.5 | ChIP-seq         | H3K27ac  | ENCSR275KPI   |
| Forebrain                   | Mus musculus | E15.5 | ChIP-seq         | H3K27ac  | ENCSR691NQH   |
| Forebrain                   | Mus musculus | P0    | ChIP-seq         | H3K27ac  | ENCSR094TTT   |
| Forebrain                   | Mus musculus | E11.5 | DNase-seq        | /        | ENCSR014SFF   |
| Forebrain                   | Mus musculus | E14.5 | DNase-seq        | /        | ENCSR337EDG   |
| Forebrain                   | Mus musculus | P0    | DNase-seq        | /        | ENCSR791AJY   |
| Forebrain                   | Mus musculus | E11.5 | ChIP-seq         | H3K4me1  | ENCSR975QSF   |
| Forebrain                   | Mus musculus | E15.5 | ChIP-seq         | H3K4me1  | ENCSR875KRK   |
| Forebrain                   | Mus musculus | P0    | ChIP-seq         | H3K4me1  | ENCSR465PLB   |

|                   |              |       |           |          |             |
|-------------------|--------------|-------|-----------|----------|-------------|
| Forebrain         | Mus musculus | E11.5 | ChIP-seq  | H3K4me3  | ENCSR739DVM |
| Forebrain         | Mus musculus | E15.5 | ChIP-seq  | H3K4me3  | ENCSR022KDE |
| Forebrain         | Mus musculus | P0    | ChIP-seq  | H3K4me3  | ENCSR258YWW |
| Forebrain         | Mus musculus | E11.5 | ChIP-seq  | H3K36me3 | ENCSR066LZB |
| Forebrain         | Mus musculus | E15.5 | ChIP-seq  | H3K36me3 | ENCSR437SFX |
| Forebrain         | Mus musculus | P0    | ChIP-seq  | H3K36me3 | ENCSR069TDC |
| Midbrain          | Mus musculus | E11.5 | ChIP-seq  | H3K27ac  | ENCSR088UKA |
| Midbrain          | Mus musculus | E15.5 | ChIP-seq  | H3K27ac  | ENCSR428GHF |
| Midbrain          | Mus musculus | P0    | ChIP-seq  | H3K27ac  | ENCSR672ZXY |
| Midbrain          | Mus musculus | E11.5 | DNase-seq | /        | ENCSR292QBA |
| Midbrain          | Mus musculus | E14.5 | DNase-seq | /        | ENCSR367FCW |
| Midbrain          | Mus musculus | P0    | DNase-seq | /        | ENCSR767AJS |
| Midbrain          | Mus musculus | E11.5 | ChIP-seq  | H3K4me1  | ENCSR450ITF |
| Midbrain          | Mus musculus | E15.5 | ChIP-seq  | H3K4me1  | ENCSR449EUZ |
| Midbrain          | Mus musculus | P0    | ChIP-seq  | H3K4me1  | ENCSR391WSS |
| Midbrain          | Mus musculus | E11.5 | ChIP-seq  | H3K4me3  | ENCSR283RFW |
| Midbrain          | Mus musculus | E15.5 | ChIP-seq  | H3K4me3  | ENCSR486MHP |
| Midbrain          | Mus musculus | P0    | ChIP-seq  | H3K4me3  | ENCSR427ZJU |
| Midbrain          | Mus musculus | E11.5 | ChIP-seq  | H3K36me3 | NCSR535NVF  |
| Midbrain          | Mus musculus | E15.5 | ChIP-seq  | H3K36me3 | ENCSR487RAU |
| Midbrain          | Mus musculus | P0    | ChIP-seq  | H3K36me3 | ENCSR951UWY |
| Hindbrain         | Mus musculus | E11.5 | ChIP-seq  | H3K27ac  | ENCSR129LAP |
| Hindbrain         | Mus musculus | E15.5 | ChIP-seq  | H3K27ac  | ENCSR066XFL |
| Hindbrain         | Mus musculus | P0    | ChIP-seq  | H3K27ac  | ENCSR332JYZ |
| Hindbrain         | Mus musculus | E11.5 | DNase-seq | /        | ENCSR358ESL |
| Hindbrain         | Mus musculus | E14.5 | DNase-seq | /        | ENCSR179PIH |
| Hindbrain         | Mus musculus | P0    | DNase-seq | /        | ENCSR469VGZ |
| Hindbrain         | Mus musculus | E11.5 | ChIP-seq  | H3K4me1  | ENCSR695FPP |
| Hindbrain         | Mus musculus | E15.5 | ChIP-seq  | H3K4me1  | ENCSR921ILW |
| Hindbrain         | Mus musculus | P0    | ChIP-seq  | H3K4me1  | ENCSR617VBE |
| Hindbrain         | Mus musculus | E11.5 | ChIP-seq  | H3K4me3  | ENCSR928CYU |
| Hindbrain         | Mus musculus | E15.5 | ChIP-seq  | H3K4me3  | ENCSR335TVR |
| Hindbrain         | Mus musculus | P0    | ChIP-seq  | H3K4me3  | ENCSR472YGQ |
| Hindbrain         | Mus musculus | E11.5 | ChIP-seq  | H3K36me3 | ENCSR175QZX |
| Hindbrain         | Mus musculus | E15.5 | ChIP-seq  | H3K36me3 | ENCSR809NWL |
| Hindbrain         | Mus musculus | P0    | ChIP-seq  | H3K36me3 | ENCSR458PAO |
| Forebrain         | Mus musculus | E12.5 | ChIP-seq  | P300     | GSE88789    |
| Facial prominence | Mus musculus | E15.5 | ChIP-seq  | H3K27ac  | ENCSR382DRK |
| Heart             | Mus musculus | E15.5 | ChIP-seq  | H3K27ac  | ENCSR574VME |
| Intestine         | Mus musculus | E15.5 | ChIP-seq  | H3K27ac  | ENCSR599GVS |



|                                    |              |            |          |         |             |
|------------------------------------|--------------|------------|----------|---------|-------------|
| Kidney                             | Mus musculus | E15.5      | ChIP-seq | H3K27ac | ENCSR711SVB |
| Limb                               | Mus musculus | E15.5      | ChIP-seq | H3K27ac | ENCSR988BRP |
| Liver                              | Mus musculus | E15.5      | ChIP-seq | H3K27ac | ENCSR479LFP |
| Lung                               | Mus musculus | E15.5      | ChIP-seq | H3K27ac | ENCSR895BMP |
| Neural tube                        | Mus musculus | E15.5      | ChIP-seq | H3K27ac | ENCSR241BSK |
| Stomach                            | Mus musculus | E15.5      | ChIP-seq | H3K27ac | ENCSR929SEW |
| Cortical plate                     | Mus musculus | 8 weeks    | ChIP-seq | H3K27ac | ENCSR000CDD |
| Cortex                             | Mus musculus | E14.5      | ChIP-seq | TBR2    | GSE63621    |
| Cortex                             | Mus musculus | E14.5      | ChIP-seq | NEUROD2 | GSE67539    |
| Cortex                             | Mus musculus | E14.5      | ChIP-seq | NEUROG2 | GSE63621    |
| Embryonic neural stem cells        | Mus musculus | E14.5      | ChIP-seq | FOXP1   | GSE101632   |
| Cortex                             | Mus musculus | E15        | ChIP-seq | SATB2   | GSE68910    |
| Cortex                             | Mus musculus | E12.5      | ChIP-seq | SMAD3   | GSE36673    |
| ES-derived NPCs                    | Mus musculus | /          | ChIP-seq | SOX2    | GSE35496    |
| ES-derived NPCs                    | Mus musculus | /          | ChIP-seq | YY1     | GSE25197    |
| AtT-20 cells                       | Mus musculus | /          | ChIP-seq | ASH2    | GSE87180    |
| Embryonic Stem Cells               | Mus musculus | E14        | ChIP-seq | GFP     | GSE52071    |
| B cells                            | Mus musculus | 6-14 weeks | ChIP-seq | ASH2    | GSE20852    |
| <i>in vitro</i> differentiated NPC | Mus musculus | /          | Hi-C     | /       | GSE96107    |
| Neuron                             | Mus musculus | E14.5      | Hi-C     | /       | GSE96107    |
| H1 Neuronal Progenitor cells       | Homo sapiens | /          | Hi-C     | /       | GSE52457    |
| H1 embryonic stem cells            | Homo sapiens | /          | Hi-C     | /       | GSE52457    |
| H1 Mesendoderm cells               | Homo sapiens | /          | Hi-C     | /       | GSE52457    |
| H1 Trophectoderm cells             | Homo sapiens | /          | Hi-C     | /       | GSE52457    |
| H1 Mesenchymal stem cells          | Homo sapiens | /          | Hi-C     | /       | GSE52457    |
| Dorsolateral Prefrontal Cortex     | Homo sapiens | Adult      | Hi-C     | /       | GSE87112    |



|                                        |                            |                                                                    |
|----------------------------------------|----------------------------|--------------------------------------------------------------------|
| <i>Ctnnb1</i> _Ex3_R                   | cttgccactcaggaagga         | used for CHIP-qPCR                                                 |
| <i>neCtnnb1</i> _ctrl_F                | ctgcttaagctctgccagg        | used for CHIP-qPCR                                                 |
| <i>neCtnnb1</i> _ctrl_R                | ttgacatcatggcagcttc        | used for CHIP-qPCR                                                 |
| hDesert_F                              | gggagatggagaaaggtggaaggtt  | used for CHIP-qPCR                                                 |
| hDesert_R                              | cccaaggccataaaaatagagctggg | used for CHIP-qPCR                                                 |
| <i>pCTNNB1</i> -CHIP-F                 | gagaggtgggatccaccatcc      | used for CHIP-qPCR                                                 |
| <i>pCTNNB1</i> -CHIP-R                 | tcgccgacctgtgtgtctgtg      | used for CHIP-qPCR                                                 |
| <i>neCtnnb1</i> -CHIP-F                | gcgggcttctatccccatctg      | used for CHIP-qPCR                                                 |
| <i>neCtnnb1</i> -CHIP-R                | tgatgtggcacctcgggacc       | used for CHIP-qPCR                                                 |
| <i>Ash2l</i> _sh1                      | ccttaggctatgataagttta      | used for knockdown <i>Ash2l</i>                                    |
| <i>Ash2l</i> _sh2                      | cctgtgtctgtgtgttccaaa      | used for knockdown <i>Ash2l</i>                                    |
| <i>ASH2L</i> _sh1                      | gtgactgttatcctactata       | used for knockdown <i>ASH2L</i>                                    |
| <i>ASH2L</i> _sh2                      | cctgctgtatgaacgggttt       | used for knockdown <i>ASH2L</i>                                    |
| <i>Ash2l</i> _F                        | cctactttcctcgggaagcaag     | used for RT-qPCR                                                   |
| <i>Ash2l</i> _R                        | gacaatgttattggccaagtc      | used for RT-qPCR                                                   |
| <i>ASH2L</i> _F                        | agaatggccgacagttggg        | used for RT-qPCR                                                   |
| <i>ASH2L</i> _R                        | cctcaagtttgctgtctcc        | used for RT-qPCR                                                   |
| <i>Ctnnb1</i> _F                       | atggagccggacagaaaagc       | used for RT-qPCR                                                   |
| <i>Ctnnb1</i> _R                       | cttgccactcaggaagga         | used for RT-qPCR                                                   |
| <i>CTNNB1</i> _F                       | aaagcggctgttagctactgg      | used for RT-qPCR                                                   |
| <i>CTNNB1</i> _R                       | cgagtcattgcatactgtccat     | used for RT-qPCR                                                   |
| <i>Satb2</i> _F                        | gccgtgggaggtttgatgatt      | used for RT-qPCR                                                   |
| <i>Satb2</i> _R                        | accaagacgaactcagcgtg       | used for RT-qPCR                                                   |
| <i>Neurod2</i> _F                      | aagccagtgtctctcgtgg        | used for RT-qPCR                                                   |
| <i>Neurod2</i> _R                      | gccttggtcatcttgcgttt       | used for RT-qPCR                                                   |
| <i>Sox2</i> _F                         | gcgagtggaactttgtcc         | used for RT-qPCR                                                   |
| <i>Sox2</i> _R                         | cgggaagcgtgtacttatcctt     | used for RT-qPCR                                                   |
| <i>Yy1</i> _F                          | cagtggttgaagagcagatcat     | used for RT-qPCR                                                   |
| <i>Yy1</i> _R                          | agggagttcttgcctgtcat       | used for RT-qPCR                                                   |
| <i>Gapdh</i> _F                        | aggtcgggtgaacggatttg       | used for RT-qPCR                                                   |
| <i>Gapdh</i> _R                        | tgtagaccatgtagttgaggta     | used for RT-qPCR                                                   |
| <i>Ctnnb1</i> <sup>lox(ex3)</sup> -F   | ggtagtggccctgcccttgacac    | used for validation of <i>Ctnnb1</i> <sup>lox(ex3)</sup> mice      |
| <i>Ctnnb1</i> <sup>lox(ex3)</sup> -AS5 | acgtctggcaagttccgcgtcatcc  | used for validation of <i>Ctnnb1</i> <sup>lox(ex3)</sup> mice      |
| <i>Ctnnb1</i> <sup>lox(ex3)</sup> -P85 | ctaagcttggtggacgtaaacctc   | used for validation of <i>Ctnnb1</i> <sup>lox(ex3)</sup> mice      |
| <i>Ctnnb1</i> <sup>KO</sup> -WT-F      | ccctgcccctgcatatagcatttga  | used for validation of <i>Ctnnb1</i> <sup>KO</sup> mice            |
| <i>Ctnnb1</i> <sup>KO</sup> -WT-R      | ccccacctgtgatgctttgatgtct  | used for validation of <i>Ctnnb1</i> <sup>KO</sup> mice            |
| <i>Ctnnb1</i> <sup>KO</sup> -Mut-R     | atgctgtgtgagtgaccctactcct  | used for validation of <i>Ctnnb1</i> <sup>KO</sup> mice            |
| LacZ F                                 | atcctctgcatggtcaggtc       | used for validation of <i>neCtnnb1</i> -LacZ-iCre and BAT-Gal mice |
| LacZ R                                 | cgtggcctgattcattcc         | used for validation of <i>neCtnnb1</i> -LacZ-iCre and BAT-Gal mice |
